1           A preliminary study of resting brain metabolism in  
2           treatment-resistant depression before and after treatment  
3           with olanzapine-fluoxetine combination

4           Short title: FDG PET in treatment-resistant depression with  
5           olanzapine/fluoxetine combination therapy

6           José V. Pardo<sup>1,2\*</sup>, Sohail A. Sheikh<sup>1,2#a</sup>, Graeme Schwindt<sup>1#b</sup>, Joel T. Lee<sup>1</sup>, David E.  
7           Adson<sup>2</sup>, Barry Rittberg<sup>2</sup>, Faruk S. Abuzzahab, Sr.<sup>2</sup>

8

9           <sup>1</sup>Cognitive Neuroimaging Unit, Mental Health PSL, Minneapolis VA Health Care  
10           System, Minneapolis, Minnesota, United States of America

11           <sup>2</sup>Department of Psychiatry, University of Minnesota, Minneapolis, Minnesota, United  
12           States of America

13           #a Current Address: Department of Psychiatry, Hawkes Bay Hospital, Gisborne &  
14           Hawkes Bay, New Zealand

15           #b Current Address: Department of Family Medicine, Sunnybrook Health Science  
16           Center, Toronto, Ontario, Canada

17           \*Corresponding author

18           E-mail: [jvpardo@umn.edu](mailto:jvpardo@umn.edu); [jose.pardo@va.gov](mailto:jose.pardo@va.gov) (JVP)

## 19 **Abstract**

20 Treatment-resistant depression (TRD) occurs in many patients and causes high  
21 morbidity and mortality. Because TRD subjects are particularly difficult to study  
22 especially longitudinally, biological data remain very limited. In a preliminary study to  
23 judge feasibility and power, 25 TRD patients were referred from specialty psychiatric  
24 practices. All were severely and chronically depressed and mostly had comorbid  
25 psychiatric disorders as is typical in TRD. Nine patients were able to complete all  
26 required components of the protocol that included diagnostic interview; rating scales;  
27 clinical magnetic resonance imaging; medication washout; treatment with maximally  
28 tolerated olanzapine-fluoxetine combination for 8 weeks; and pre- and post-treatment  
29 fluorodeoxyglucose positron emission tomography. This drug combination is an  
30 accepted standard of treatment for TRD. Dropouts arose from worsening depression,  
31 insomnia, and anxiety. One patient remitted; three responded. A priori regions of  
32 interest included the amygdala and subgenual cingulate cortex (sgACC; BA25).  
33 Responders showed decreased metabolism with treatment in the right amygdala that  
34 correlated with clinical response; no significant changes in BA25; better response to  
35 treatment the higher the baseline BA25 metabolism; and decreased right ventromedial  
36 prefrontal metabolism (VMPFC; broader than BA25) with treatment which did not  
37 correlate with depression scores. The baseline metabolism of all individuals showed  
38 heterogeneous patterns when compared to a normative metabolic database. Although  
39 preliminary given the sample size, this study highlights several issues important for  
40 future work: marked dropout rate in this study design; need for large sample size for  
41 adequate power; baseline metabolic heterogeneity of TRD requiring careful subject

42 characterization for future studies of interventions; relationship of amygdala activity  
43 decreases with response; and the relationship between baseline sgACC and VMPFC  
44 activity with response. Successful treatment of TRD with olanzapine-fluoxetine  
45 combination shows changes in cerebral metabolism similar to those seen in treatment-  
46 responsive major depression.

47

48

49

50

51

52

53

54

55

56

57

58

59

60

61

## 62 Introduction

63 Treatment-resistant depression (TRD) is often operationally defined as a major  
64 depressive episode that fails to remit after treatment with at least two antidepressants of  
65 different classes at therapeutic doses for an adequate treatment period [1-8]. More  
66 extensive staging criteria for TRD have been proposed as well [1]. TRD must be  
67 distinguished from inadequately treated depression resulting from numerous factors  
68 such as patient non-compliance, intolerance to side effects, misdiagnosis (e.g., thyroid  
69 disease), low dosage, etc. [2]. It is unclear if TRD is a particularly malignant form of  
70 depression with its own pathophysiology, or if treatment-related changes in brain  
71 metabolism are different than those found in treatment-responsive depression [3].  
72 Patients with TRD are at increased risk of relapse [4]. Also, most TRD patients have  
73 numerous psychiatric comorbidities inherently raising potential confounds with diagnosis  
74 [5-8].

75 The STAR\*D trial documents TRD is a frequent occurrence and a serious problem in  
76 psychiatry afflicting about 30% of patients [4]. In terms of disease burden, it is second  
77 only to back pain in terms of life-years of disability [9]. The high significance of TRD has  
78 prompted an aggressive search for novel, more effective treatments including new  
79 classes of antidepressants (e.g., glutamatergic receptor antagonists, neuroactive  
80 steroids), add-on treatments (drug combinations, boosters such as lithium or  
81 liothyronine, atypical neuroleptics, mood stabilizers), and devices for neuromodulation  
82 (e.g., transcranial magnetic stimulation, vagus nerve stimulation, deep brain stimulation,  
83 direct current stimulation).

84 Despite the clinical importance of TRD, few studies have examined its biology and  
85 treatment. Several challenges have hindered such research. The recruitment of TRD  
86 patients is difficult. These patients are likely heterogenous in pathology, have numerous  
87 comorbidities, and are quite ill with significant risk for suicide. Their cross-sectional  
88 physiology may be confounded by the many previous treatment trials. At best, the  
89 medley of ineffective medications needs wash out, but this may lead to potential  
90 withdrawal symptoms or symptom worsening. Encouragement to undergo yet another  
91 treatment after so many failed trials becomes paramount. These patients need frequent  
92 follow-up and clinician availability. Despite these impediments, some work has been  
93 done using F<sup>18</sup>-fluorodeoxyglucose positron emission tomography (FDG PET) in those  
94 with TRD [10-18]. However, not only does the biology of TRD, if homogeneous, remain  
95 unclear, but also no biomarkers predicting treatment resistance have reached clinical  
96 utility for this group of patients.

97 Past neuroimaging studies of treatment-responsive depression have highlighted the  
98 amygdala and subgenual anterior cingulate cortex (sgACC) as key nodes of  
99 depression-related circuitry showing reduction in activity with successful treatment (see  
100 reviews [19-21]), although there are exceptions (e.g., no sg ACC change [22]; no  
101 amygdala change [23]). Studies have suggested several features may characterize  
102 TRD such as sgACC hyperactivity, amygdala hyperactivity, prefrontal/thalamic  
103 dysconnectivity, habenular connectivity, prefrontal hypoactivity, and hippocampal  
104 subfield volumes [10, 13, 14, 24-26]; however, consensus is yet to be achieved.

105 To our knowledge, there are no prior studies of brain metabolism in TRD patients  
106 with drug washout to establish a baseline examined both before and after a full trial of a  
107 combination antidepressant and atypical neuroleptic. Yet, the combination of  
108 antidepressant and atypical neuroleptic is being used increasingly throughout the world  
109 to treat TRD. The present study is of necessity preliminary, as no prior data existed with  
110 which to power the sample size or even to determine its feasibility.

111 With a focus on the amygdala and sgACC based on prior literature, this cohort  
112 observational study sought to test feasibility and to characterize regional brain  
113 metabolism in TRD before and after adequate treatment with a combination of an  
114 atypical neuroleptic (olanzapine) and fluoxetine (O/F), a selective serotonin reuptake  
115 inhibitor (SSRI) antidepressant. Use of these drugs in combination will be referred to  
116 hereafter as O/F.

117 This drug combination was the first drug approved by the USA Food and Drug  
118 Administration in 2009 specifically for the indication of TRD [27]. There have been  
119 several clinical trials, reviews, and meta-analyses examining the efficacy of O/F for  
120 TRD; that discussion is beyond the scope of this study [28-35]. Originally, use of O/F  
121 was based on preclinical work. Neurobiological changes associated with O/F dosing in  
122 rats include increased prefrontal monoamine levels [36, 37] and suppression of limbic  
123 immediate-early gene expression [38] relative to olanzapine or fluoxetine alone. No  
124 differential effects on limbic neurogenesis were found using O/F, whereas the individual  
125 drugs are associated with neurogenesis [39]. Whereas higher doses of O/F increased  
126 levels of neurotrophin-3 selectively in rat prefrontal cortex, low O/F doses or higher

127 doses of olanzapine or fluoxetine administered individually did not [40]. These animal  
128 findings suggest some unique effects of O/F therapy not accounted for by the actions of  
129 the individual drugs.

130 The aim of the present work was not to assess efficacy or health outcomes in a  
131 clinical trial, as this has been reported previously (see above). Rather, the project's  
132 purpose was to use imaging to bear on the question of mechanisms. Whether such  
133 combination treatments for TRD follow similar metabolic effects to other antidepressants  
134 in treatment-responsive depression is unknown. In addition, the individual TRD patient's  
135 deviation from a normative database indicate for the first time the potential changes in  
136 regional brain metabolism in an individual, unmedicated, TRD patient. Such data could  
137 address preliminarily whether sgACC hypermetabolism or other biomarker is  
138 characteristic of TRD, a key issue in patient selection for future treatment trials of TRD.

## 139 **Materials and Methods**

### 140 **Participants**

141 Twenty-five participants with severe TRD were enrolled. They had many  
142 psychotherapy and medication trials, some even failing convulsive therapy. They all had  
143 a longstanding chronic illness lasting many years. Most had comorbid psychiatric  
144 disorders. They were recruited and enrolled through referral from physicians' outpatient  
145 clinics known to specialize in the treatment of TRD (co-authors: DA, BR, FSA). The  
146 principal inclusion criterion was severe, refractory major unipolar depressive disorder  
147 (Scheduled Clinical Interview for Diagnostic and Statistical Manual-IV; SCID [41]) as the

148 primary diagnosis. Exclusion criteria included a lifetime history of cognitive impairment,  
149 psychosis, bipolar disorder, drug dependence, pregnancy, as well as any clinically  
150 significant findings on magnetic resonance imaging. All subjects provided written  
151 informed consent as approved by the VA Institutional Review Board (IRB) and the  
152 Radioactive Drug Research Committee (RDRC) approved by the FDA.

## 153 **Treatment**

154 Patients' polypharmacy was tapered with washout for two weeks before the baseline  
155 measurement of glucose uptake using FDG PET as described previously [42]. They  
156 were then titrated to the maximal tolerated dose of fluoxetine ( $\leq 60$  mg) and olanzapine  
157 ( $\leq 30$  mg). The use of the combination of an SSRI such as fluoxetine and an atypical  
158 neuroleptic such as olanzapine is a standard of care in the management of patients with  
159 TRD. The maximal tolerated dose was held constant for eight weeks except for rescue  
160 medication of low dose benzodiazepine or short acting hypnotics for severe anxiety or  
161 insomnia. Given the seriousness of the illness, risk for suicide, and focus on  
162 mechanisms rather than efficacy, the study had no placebo control medication. Patients  
163 were seen either weekly or every two weeks (depending on stability) during wash out  
164 and treatment. Compliance was checked by counting of pills every 1-2 weeks. Side  
165 effects were evaluated with open-ended questions without checklists typical of clinical  
166 trials. After treatment with O/F for eight weeks and PET imaging, they were returned to  
167 their referring psychiatrist for continued assessment and follow-up.

168



## 169 **Clinical Assessments**

170 All subjects were assessed by their referring physician as having TRD as their  
171 primary diagnosis. Medical records were reviewed to ensure all subjects had at least  
172 two trials of antidepressants from different classes with adequate doses and duration of  
173 treatment (at least stage III TRD [1]). All subjects underwent structured diagnostic  
174 interviews using the SCID-1, Clinician Version [43]. The primary outcome measure was  
175 the change in Montgomery-Asberg Depression Rating Scale (MADRS [44]) score after  
176 eight weeks of treatment. A clinical response was defined as a greater than or equal to  
177 50% drop in depression score, while a remission was defined as a MADRS of less than  
178 or equal to 8. Anxiety was scored with the Hamilton Anxiety Scale (HAMA [45]).  
179 Additional testing not directly pertinent to the present study included Clinical Global  
180 Impression Scale (CGI [46]), Mini-Mental Status Exam (MMSE [47]), Shipley Institute of  
181 Living Scale [48], Edinburgh Handedness Inventory [49], Profile of Mood States (POMS)  
182 [50], and Positive Affect Negative Affect Scale (PANAS [51]).

## 183 **Positron emission tomography**

184 Patients were scanned after washout (pre-treatment or baseline) and after  
185 completion of the eight weeks of treatment at maximal tolerated dose (post-treatment).  
186 Participants fasted for at least six hours before imaging; blood glucose was checked  
187 immediately before scanning. The relative regional glucose uptake was measured by  
188 injecting intravenously a bolus of  $^{18}\text{F}$ -FDG in saline at a dose of 185 MBq (5 mCi)/70 kg.  
189 They rested for 50 minutes during tracer uptake with eyes closed and ears open in a

190 dimly lit, quiet room while being monitoring for wakefulness. The scanner was a  
191 Siemens (Knoxville, TN, USA) ECAT EXACT 47 operated in 2-D mode with septae  
192 extended. After measured attenuation, counts were collected during an emission scan  
193 lasting 20 minutes. Data were corrected for scatter, decay, randoms, and electronic  
194 deadtime. Images were reconstructed using filtered backprojection to a resolution of  
195 approximately 12 mm full width at half maximum.

## 196 **Image analysis**

197 Image analysis followed routine procedures including normalization for whole-brain  
198 activity, intersubject stereotactic averaging, subtraction of pre- from post-treatment  
199 activity, statistical parametric mapping, and threshold  $Z = 3.3$  as previously described  
200 [52]. Images were warped nonlinearly into stereotactic space [53] with regression for  
201 age using Neurostat software [54]. Parametric maps were overlaid on a template MRI  
202 blurred to a similar resolution as the PET scan. In-house software (iiV,  
203 <http://james.psych.umn.edu/iiV/>) was used to display results on a standard MRI  
204 template [55]. For an exploratory look at individual TRD patient's whole-brain voxelwise  
205 differences from our normative database ( $N = 30$ ). For the purposes of display, the  
206 individually warped  $t$  images used an uncorrected magnitude threshold of  $p < \sim 0.05$ .

## 207 **Regions of interest**

208 Two ROIs were examined based upon existing, extensive literature (see Fig 1):  
209 amygdala and sgACC. The amygdala ROI consisted of a sphere of 13 mm diameter  
210 center on each amygdala in the atlas of Talairach and Tournoux (1988, Fig 1) at

211 coordinates ( $\pm 23$ , -4, -16). Mean counts were collected for each ROI from the pre- and  
212 post- treatment scans for each patient. The percent change in MADRS score was  
213 regressed linearly against the mean amygdala activity. Paired t-tests were used to  
214 compare mean amygdala counts before and after treatment for the group and for  
215 responders vs. non-responders separately. A threshold of  $p < 0.05$  was used for the  
216 ROI analysis.

217 

218 **Figure 1. Amygdala (A) and sgACC/VMPFC (B) regions of interest.**

219 

220 Based upon an *a priori* focus on the sgACC, we defined two additional subregions  
221 within sgACC for this analysis. Previous studies point to changes in subgenual  
222 metabolism that are not restricted to the sgACC of Brodmann area 25 (BA25) but  
223 extend along the ventromedial cingulate cortex [10, 18, 56, 57]. So, a region including  
224 only those voxels labeled as BA25 by the atlas of Talairach and Tournoux [53] was  
225 created using the Talairach Daemon  
226 (<http://ric.uthscsa.edu/projects/talairachdaemon.html>) [58]. A second, less specific  
227 region was drawn as a cuboid on each hemisphere with the following extents measured  
228 from the anterior commissure: x,  $\pm(1-12$  mm); y, 10-25 mm; z, -5 to -16) mm [53]. This  
229 approximated the region of hypometabolism associated with antidepressant treatment  
230 reported previously by our laboratory [18]. The region encompasses BA25, as well as  
231 portions of BA32 and BA33 and will be referred to as subgenual/VMPFC (Fig 1B).

232 Mean counts from each of these subgenual regions were compared pre- and post-  
233 treatment for responders and non-responders using paired *t*-tests. Percent-change in  
234 mean ROI metabolism was linearly regressed against percent-change in MADRS  
235 across all subjects. Pre-treatment mean metabolism was also regressed against  
236 percent change in MADRS.

237 One additional unplanned ROI was included post hoc because of its proximity to the  
238 amygdala, involvement in depression, and similar response to treatment in published  
239 work [22]. A 13 mm diameter spherical ROI was centered on the hippocampus at the  
240 following Talairach coordinates: x,  $\pm 27$  mm, y, -23 mm; z, -9 mm or MNI ( $\pm 27$ , -22, -0)  
241 <http://sprout022.sprout.yale.edu/mni2tal/mni2tal.html>.

242 A repeated measures ANOVA was performed on the amygdala, VMPFC, and head  
243 of the hippocampus ROIs as defined above. Extensive prior literature highlights these  
244 regions as important in affective illness. The BA25 region was not included as no  
245 change in activity occurred with treatment (see below). The dependent measure was  
246 glucose uptake (PET counts). Repeated measures included TIME (Pre-treatment, Post-  
247 treatment), ROI (amygdala, hippocampus, and VMPFC), and SIDE (right hemisphere,  
248 left hemisphere). Additionally, the correlation matrix for glucose uptake across  
249 amygdala, VMPFC, and hippocampus was calculated (S2 Table).

## 250 **Results**

### 251 **Clinical response**

252 Drug wash out led frequently to increased insomnia, anxiety, and depression which were  
253 the leading reasons for discontinuation by participants (N = 16). Side effects from O/F observed  
254 reflected those commonly seen with this drug combination [28]. There were no suicide attempts  
255 during the study. Nine participants completed the entire protocol (clinical MRI; drug washout;  
256 O/F treatment; Pre- and Post-treatment PET scans). Clinical data are shown in Table 1 which  
257 includes demographics, gender, family history of depression, illness onset, comorbidities (both  
258 current and lifetime), failed treatments, and response designation. The HAMA and MADRS  
259 scores as well as weights before and after treatment are displayed in S1 Table. The average  
260 tolerated dose was 39 mg (range 30-45 mg) of fluoxetine and 12 mg (range 10-12 mg) of  
261 olanzapine. Their weight increased significantly during treatment (S1 Table; S1 Figure); there  
262 was no interaction between time (pre vs post) and response ( $p > 0.2$ ). The average baseline  
263 MADRS score was 31 (SD 5; range 24-38); no significant differences arose in baseline MADRS  
264 score between responders vs. non-responders ( $p > 0.3$ ; no shown). Completers showed a  
265 decrease in MADRS score following eight weeks of treatment (Mean, 12; SD, 5; S1 Table). The  
266 baseline HAMA did not differ between responders vs. non-responders ( $p < 0.72$ ). The HAMA  
267 declined significantly also after treatment ( $t(8) = 4.7$ ;  $p < 0.002$ ) with the significance driven by  
268 the non-responders ( $p < 0.006$ ; responders,  $p < 0.13$ ). Four patients responded; one of these  
269 achieved remission. Of note, responders tended to have fewer comorbidities and earlier onset  
270 than non-responders.

---

271

272

273

274

275

276 **Table 1. Patient demographics and outcomes.**

| Age | Sex | Family History of MDD | Life time Comorbidity | Current Comorbidity                       | Failed medications                                                                                                   | Baseline MADRS | % Change | Response    |
|-----|-----|-----------------------|-----------------------|-------------------------------------------|----------------------------------------------------------------------------------------------------------------------|----------------|----------|-------------|
| 47  | F   | +                     |                       | OCD, Anorexia, PD, Anxiety NOS, Dysthymia | SSRIs, venlafaxine, atypical neuroleptics, TCAs, mirtazapine, nefazodone, bupropion, ECT, anticonvulsants, buspirone | 33             | -6%      | -           |
| 44  | M   | +                     |                       | PD, Dysthymia                             | SSRIs, venlafaxine, mirtazapine, benzodiazepines                                                                     | 29             | -17%     | -           |
| 52  | M   | unknown               |                       |                                           | SSRIs, venlafaxine, lithium                                                                                          | 37             | -22%     | -           |
| 36  | M   | +                     | OCD, ADD              |                                           | SSRIs, venlafaxine, TCA, MAOI, T3, stimulants, dopamine agonist, anticonvulsants                                     | 27             | -26%     | -           |
| 62  | F   | +                     |                       |                                           | SSRIs, venlafaxine, anticonvulsant, atypical neuroleptic                                                             | 29             | -59%     | +           |
| 54  | M   | +                     |                       |                                           | SSRIs, venlafaxine, lithium, buspirone, TCA, anticonvulsants                                                         | 24             | -83%     | +(remitted) |
| 61  | M   | +                     | OCD, ADD, dysthymia   |                                           | SSRIs, venlafaxine, bupropion, benzodiazepine, stimulants, T4, nefazodone                                            | 31             | -35%     | -           |
| 27  | M   | +                     | ADHD                  | GAD                                       | SSRIs, venlafaxine, atypical neuroleptic, mirtazapine                                                                | 38             | -50%     | +           |
| 41  | M   | +                     |                       |                                           | SSRIs, venlafaxine, atypical neuroleptic                                                                             | 28             | -64%     | +           |

277 M, male; F, female; MDD, major depressive disorder, OCD, obsessive compulsive disorder; ADD,

278 attention deficit disorder; ADHD, attention deficit disorder with hyperactivity; PD, personality disorder;

279 NOS, not otherwise specified; GAD, generalized anxiety disorder; SSRI, selective serotonin reuptake  
280 inhibitor; TCA, tricyclic antidepressant; ECT, electro-convulsive therapy; MAOI, monoamine oxidase  
281 inhibitor; T3, liothyronine; T4, levothyroxine; MADRS, Montgomery Asberg Depression Rating Scale

---

282

283 A 2 x 2 Analysis-of-Variance with Treatment-response (responder vs. non-  
284 responder) as the between-subject factor and Time (post vs. pre-test) as the within-  
285 subject factor demonstrated a main effect of Time ( $F(1,7) = 195.2, p < 0.001$ ), confirming  
286 that MADRS scores decreased significantly across sessions. The interaction of  
287 Treatment-response X Time was also significant ( $F(1,7) = 43.9, p < 0.001$ ). This  
288 interaction confirmed that responders showed significantly greater reductions in MADRS  
289 scores than non-responders.

## 290 Whole-brain exploratory image analysis

291 Voxel-wise comparisons of patients' post- and pre-treatment scans revealed  
292 significant changes (Table 2; S2-4 Figures). Patients were grouped as responders and  
293 non-responders (see above) to identify metabolic change associated with successful  
294 treatment.

---

295

296

**Table 2. Significant changes in whole-brain voxelwise analysis.**

| X<br>(mm)           | Y<br>(mm) | Z<br>(mm) | Z-score | Region               |
|---------------------|-----------|-----------|---------|----------------------|
| <i>All patients</i> |           |           |         |                      |
| 12                  | -35       | 54        | +3.4    | R paracentral lobule |
| 6                   | -60       | 43        | +3.3    | R precuneus (BA7)    |

|                       |     |     |      |                                     |
|-----------------------|-----|-----|------|-------------------------------------|
| -12                   | -60 | -20 | -4.6 | L Cerebellum                        |
| 17                    | -94 | -4  | -3.7 | R Lingual Gyrus (BA18)              |
| 28                    | 14  | -20 | -3.6 | R Inferior Frontal Gyrus (BA47)     |
| -15                   | -33 | 7   | -3.6 | L Thalamus                          |
| -37                   | -64 | -22 | -3.5 | L Cerebellum                        |
| 30                    | -49 | -27 | -3.4 | R Cerebellum                        |
| -12                   | -10 | 0   | -3.4 | L Thalamus                          |
| 10                    | -1  | -4  | -3.3 | R globus pallidus                   |
| <b>Non-responders</b> |     |     |      |                                     |
| -8                    | -60 | -16 | -5.2 | L Cerebellum                        |
| 8                     | -49 | -29 | -4.6 | R Cerebellum                        |
| -17                   | -53 | 29  | -4.4 | L Cingulate Gyrus (BA31)            |
| -44                   | 32  | 7   | -3.9 | L Inferior Frontal Gyrus (BA45)     |
| -10                   | -10 | 2   | -3.9 | L Thalamus                          |
| 17                    | -91 | -2  | -3.7 | R Lingual Gyrus (BA17)              |
| -51                   | -67 | 14  | -3.7 | L Middle Temporal Gyrus (BA39)      |
| -21                   | -73 | -18 | -3.7 | L Cerebellum                        |
| 1                     | -19 | -16 | -3.4 | R Midbrain                          |
| -42                   | -4  | 38  | -3.4 | L Precentral Gyrus (BA6)            |
| <b>Responders</b>     |     |     |      |                                     |
| -48                   | -13 | 2   | +3.5 | Left Superior Temporal Gyrus (BA22) |
| -53                   | -24 | 18  | +3.4 | Left Post-Central Gyrus (BA40)      |
| 6                     | -49 | 36  | +3.3 | Right Precuneus (BA31)              |
| 10                    | -58 | 38  | +3.3 | Right Precuneus (BA7)               |
| 19                    | -1  | -7  | -4.4 | Right Dorsal Amygdala               |

R, right; L, left; BA, Brodmann area



299 Responders showed increases in the left superior temporal and post-central gyri and  
300 right precuneus. Significantly reduced metabolism was confined to a peak in the right  
301 amygdaloid complex (see Fig 2). Of note, liberalizing the threshold to  $0 < 0.05$   
302 (uncorrected) revealed bilateral amygdala deactivations. Non-responders showed no  
303 significant increases in metabolism following treatment. Areas of reduced metabolism  
304 after treatment were found in non-responders in the bilateral cerebellum, lingual gyrus,  
305 middle temporal gyrus, thalamus, midbrain, and dorsal cingulate gyrus (see Table 2).  
306 For all patients as a group, no significant changes occurred in limbic structures in the  
307 whole-brain image analysis.

308

---

309 **Figure 2. Right amygdala metabolism in responders following**  
310 **olanzapine/fluoxetine treatment was the only significant decrease in the whole-**  
311 **brain voxelwise analysis.** Upper left section, coronal; lower section, transverse; upper  
312 right section, sagittal.

313

---

314 No studies have reported on individual metabolic patterns associated with  
315 unmedicated TRD. To explore this variability while accepting the limitation of the risk for  
316 false positive or negative responses, each TRD subject's baseline warped FDG PET  
317 (i.e., after medication washout or baseline) was contrasted with those of a normative  
318 database with threshold set at  $t=2.0$  for visualization as performed previously [42].  
319 These individual subtractions for the nine completers are show in S5 Figure including  
320 both increases and decreases in metabolism. Examination of individual subject's scans

321 showed considerable heterogeneity in baseline scans with a mixture of positive,  
322 negative, or null changes in the BA25/VMPFC region. This variability suggests baseline  
323 heterogeneity in TRD or metabolic changes related to the previous history of failed  
324 treatments for TRD. If any antidepressant response occurred, a relationship to  
325 metabolic signature was not evident.

## 326 **Region of interest analyses**

### 327 **ANOVA on amygdala, hippocampus, and VMPFC**

328 The repeated measures ANOVA indicated significant main effects of TIME ( $F(1,8) =$   
329  $5.992, p = 0.04$ ) and ROI ( $F(2,16) = 24.94, p = 0.001$ ) without significant interaction  
330 effects (S6 Figure). This result indicates that O/F reduces activity in all three ROIs. The  
331 analysis of the correlation matrix for the ROIs reached significance only for the  
332 correlation between the left and right sgACC post-treatment ( $r = 0.82, p = 0.007$ ; S2  
333 Table). O/F tended to increase each region's inter-hemispheric functional connectivity  
334 compared to baseline.

### 335 **Amygdala region**

336 Responders showed a significant reduction in mean glucose metabolism in the right  
337 amygdala ROI ( $t(3) = 3.38, p = 0.04$ ), while non-responders showed no change with  
338 treatment ( $t(4) = -0.68, p = 0.54$ ) (Fig 3A). There was no change in left amygdala  
339 metabolism in either group (responders:  $t(3) = 0.88, p = 0.45$ ; non-responders:  $t(4) =$   
340  $1.29, p = 0.28$ ) (Figure 3A). Regression analyses showed no correlation between  
341 percent reduction in left amygdala metabolism and percent-reduction in MADRS scores

342 across all subjects (Fig 3B,  $r = -0.20$ ,  $p = 0.61$ ). This correlation was significant in the  
343 right amygdala (Fig 3B,  $r = -0.70$ ,  $p = 0.03$ ). Because the hippocampus is near the  
344 amygdala and the resolution of PET in this study is low, the post hoc hippocampal  
345 region was also examined for changes in activity.

346

---

347 **Figure 3. Changes in amygdala glucose uptake before and after treatment and its**  
348 **relationship to depression symptoms.** (A) Amygdala metabolism examined  
349 separately for responders vs. non-responders in the right and left amygdala before and  
350 after treatment. <sup>a</sup> $p < 0.03$ . (B) Change in MADRS scores and change in amygdala  
351 metabolism. Only the right amygdala showed a significant correlation between change  
352 in metabolism and change in MADRS scores. Red line identifies threshold for response.

353

---

### 354 **Exploratory subgenual regions (BA 25 & sgACC/VMPFC)**

355 Paired  $t$ -tests revealed no changes with treatment in either the left or right BA25  
356 metabolism in either responders (left:  $t(3) = 0.05$ ,  $p = 0.97$ ; right:  $t(3) = 0.71$ ,  $p = 0.53$ ) or  
357 non-responders (left:  $t(4) = 1.13$ ,  $p = 0.32$ ; right:  $t(4) = 0.67$ ,  $p = 0.54$ ). Changes in left or  
358 right BA25 metabolism showed no correlation with changes from baseline MADRS (left:  
359  $r = 0.29$ ,  $p = 0.45$ ; right:  $r = 0.15$ ,  $p = 0.69$ ). However, baseline right hemisphere BA25  
360 metabolism showed a marginally significant correlation with change from baseline  
361 MADRS, whereby higher baseline metabolism predicted better response to O/F therapy

362 ( $r = 0.68$ ,  $p = 0.05$ ). This correlation was not significant in the left hemisphere ( $r = 0.13$ ,  
363  $p = 0.74$ ).

364 Paired t-tests revealed a significant decrease in right but not left VMPFC metabolism  
365 in responders (left:  $t(3) = 0.07$ ,  $p = 0.95$ ; right:  $t(3) = 4.18$ ,  $p = 0.02$ ), and no significant  
366 change in VMPFC metabolism in non-responders (left:  $t(4) = 0.81$ ,  $p = 0.47$ ; right:  $t(4) =$   
367  $0.53$ ,  $p = 0.62$ ). Changes in VMPFC metabolism showed no correlation with change in  
368 MADRS (left:  $r = 0.11$ ;  $p = 0.77$ ; right:  $r = 0.18$ ,  $p = 0.64$ ). Baseline metabolism in the  
369 right, but not left, VMPFC area correlated with MADRS reduction, with higher baseline  
370 metabolism predicting better response (left:  $r = 0.37$ ,  $p = 0.33$ ; right:  $r = 0.84$ ,  $p < 0.01$ ).

## 371 Discussion

372 This preliminary study found that medication-free TRD patients treated with O/F at  
373 therapeutic doses for an adequate duration showed a response-related decline in the  
374 metabolism of the right dorsal amygdala using a whole-brain, voxel-wise analysis. The  
375 dorsal amygdala in humans consists mostly of the central nucleus, the terminus of the  
376 spino-parabrachial-amygdaloid pain pathway and the principal efferent pathway for the  
377 emotional and physiological processing. Given the low resolution of the present study,  
378 caution is warranted in localization pending higher resolution techniques (e.g., higher  
379 resolution PET scanners and coregistered high resolution MRI). Several increases in  
380 metabolism surfaced also after treatment.

381 Two regions of interest (and one post-hoc region) based on existing literature were  
382 examined for drug-related changes in metabolism and relationship to response.

383 Following treatment, the change in metabolism of the right amygdala correlated with the  
384 change in MADRS score; no correlation was observed for the left amygdala. Treatment  
385 did not significantly change the smaller sgACC region defined as BA25. However, a  
386 broader ROI along the VMPFC approached significance despite the small sample size.

387 ANOVA of ROIs in the VMPFC, amygdala, and immediately adjacent hippocampus  
388 (a post hoc exploratory ROI) indicated a main effect of treatment and ROI without  
389 significant interactions. The VMPFC showed the highest activity. O/F was associated  
390 with reduced activity in all ROIs tested. The hippocampus did not appear responsible for  
391 the deactivation seen in the dorsal amygdala. However, the hippocampus may have  
392 followed similar changes with treatment that did not reach significance; such changes  
393 have been reported previously.

394 Baseline metabolism in TRD may have relevance to treatment response and may, if  
395 confirmed, find utility for patient selection in treatment trials. Greater baseline  
396 metabolism in right BA25 and sgACC/VMPFC predicted better response to O/F therapy.  
397 Also, responders showed a significant decrease in metabolism following treatment in  
398 the right VMPC region which could reflect a higher initial baseline (as BA25 was  
399 included in the right VMPFC region). The higher baseline BA25 metabolism in  
400 responders to O/F may relate to 1) higher baseline resting sgACC/VMFPC blood flow  
401 seen in TRD patients when compared to controls during neuromodulation trials [10, 11];  
402 2) increased sgACC blood flow induced by sadness induction [59]; and 3) and  
403 increased resting blood flow in sgACC/VMFPC in healthy subjects high in negative  
404 affect [60]. Likewise, the decline in right VMPFC activity in TRD treated with O/F is

405 analogous to the decline in resting blood flow in VMPFC in TRD responders treated with  
406 deep brain stimulation [10] as well as decreased VMPFC metabolism with chronic  
407 vagus nerve stimulation [18, 56].

408 Strengths of the study include the recruitment of severely ill TRD patients,  
409 medication washout before treatment, exploratory examination of individual TRD  
410 patients, and full course of treatment with O/F to maximal tolerated doses. These  
411 preliminary data suggest heterogeneity in metabolic signatures in TRD. If replicated, this  
412 heterogeneity requires consideration in the design of trials for TRD using medications or  
413 devices. However, the changes observed with treatment appear broadly like those  
414 reported in treatment-responsive major depression with other antidepressant  
415 treatments: decreased amygdala and VMPFC metabolism.

416 Limitations of this study include comorbidities, prior heterogeneous treatments  
417 during past failed trials, significant participant dropout, small final sample size, lack of a  
418 placebo, low PET resolution, and confounding of depression with anxiety measures.  
419 Patient dropouts and comorbidities could limit generalizability. However, most TRD  
420 patients do have comorbidity [5-8]. A larger replication sample could address whether  
421 major comorbidities represent a covariate of interest in the response as suggested by  
422 this study—likewise for dropouts. Future studies will need to account for the large  
423 dropout during washout. The limited resolution of PET places some ambiguity in the  
424 precise determination of amygdala activity. However, the latest scanners with resolution  
425 of 3 mm full width at half maximum will improve localization in future studies. Of note,  
426 although the ROI analysis of the right amygdala confirmed significant deactivation after

427 treatment that correlated with clinical response, the focus was only partially resolved  
428 from other nearby regions which showed a similar response pattern (e.g.,  
429 hippocampus). Depression and anxiety are both prominent symptoms in TRD, and  
430 antidepressants/atypical neuroleptics often decrease both depression and anxiety  
431 scores. In this regard, HAMD and HAMA scores are inter-correlated [61]. Anxiety scores  
432 measured in this study in responders before and after treatments did not differ.  
433 Therefore, the decrease in amygdala activity does not likely reflect changes in anxiety,  
434 but rather depression. The severity of illness and risk of suicide precluded a placebo  
435 control. However, other studies using FDG PET and placebos in test-retest designs  
436 suggest high consistency in normalized regional activity and only small changes [62-64].

## 437 **Conclusions**

438 TRD patients show considerable baseline metabolic heterogeneity following  
439 medication washout. Whether this heterogeneity arises from differing disease  
440 pathologies or from effects of past treatments remains unclear. As reported for other  
441 antidepressant therapies in treatment-responsive depression, decline in amygdala and  
442 VMPFC activity surfaced here with O/F treatment. Furthermore, decreased metabolism  
443 in the right amygdala with treatment correlated with improvement in depression  
444 following O/F treatment.

## 445 **Acknowledgments**

446 This work was supported through an Investigator-Initiated Grant from Eli  
447 Lilly & Company and the Department of Veterans Affairs (I01CX000501). A  
448 fixed dose of olanzapine and fluoxetine combination with trade name  
449 Symbyax has been approved by the USA Food and Drug Administration  
450 with indications for TRD and bipolar I depression. The funders had no role  
451 in study design, data collection and analysis, decision to publish, or  
452 preparation of the manuscript. We thank Hemant Shah for assistance in  
453 data collection and thank the volunteers for their patience and  
454 perseverance.

## 455 **Conflicts of Interest**

456 The authors declare no conflict of interest.

## 457 **Authors' Contributions**

458 JVP designed the study, secured funding, participated in data collection  
459 and analyses, and wrote/edited the final manuscript. SAS designed the  
460 study, assisted in securing funding, participated in data collection and  
461 reviewed and edited the final manuscript. GS analyzed data, provided  
462 figures, wrote the initial manuscript, and reviewed and edited the final  
463 manuscript. JTL analyzed data, contributed software, curated data,



464 provided figures, and edited the final manuscript. DA, BR, FSA provided  
465 clinical care and recruitment of the patients, gathered clinical data, and  
466 edited the final version of the manuscript.

467

468

469  
470  
471  
472  
473  
474  
475  
476  
477  
478  
479  
480  
481  
482  
483  
484  
485  
486  
487  
488  
489  
490  
491

## References Cited

- [1] Thase ME, Rush AJ. When at first you don't succeed: Sequential strategies for antidepressant nonresponders. *J Clin Psychiatry*. 1997;58 Suppl 13:23-9.
- [2] Nemeroff CB. Prevalence and management of treatment-resistant depression. *J Clin Psychiatry*. 2007;68 Suppl 8:17-25.
- [3] Fagiolini A, Kupfer DJ. Is treatment-resistant depression a unique subtype of depression? *Biol Psychiatry*. 2003;53(8):640-8.
- [4] Rush AJ, Trivedi MH, Wisniewski SR, Nierenberg AA, Stewart JW, Warden D, et al. Acute and longer-term outcomes in depressed outpatients requiring one or several treatment steps: A STAR\*D report. *Am J Psychiatry*. 2006;163(11):1905-17.
- [5] Rizvi SJ, Grima E, Tan M, Rotzinger S, Lin P, McIntyre RS, et al. Treatment-resistant depression in primary care across Canada. *Can J Psychiatry*. 2014;59(7):349-57.
- [6] De Carlo V, Calati R, Serretti A. Socio-demographic and clinical predictors of non-response/non-remission in treatment resistant depressed patients: A systematic review. *Psychiatry Res*. 2016;240:421-30.
- [7] Papakostas GI, Petersen TJ, Farabaugh AH, Murakami JL, Pava JA, Alpert JE, et al. Psychiatric comorbidity as a predictor of clinical response to nortriptyline in treatment-resistant major depressive disorder. *J Clin Psychiatry*. 2003;64(11):1357-61.
- [8] Souery D, Oswald P, Massat I, Bailer U, Bollen J, Demyttenaere K, et al. Clinical factors associated with treatment resistance in major depressive disorder: Results from a European multicenter study. *J Clin Psychiatry*. 2007;68(7):1062-70.

- 492 [9] GBD 2015 Disease and Injury Incidence and Prevalence Collaborators (Vos T, Allen  
493 C, Arora M, Barber RM, Bhutta ZA, Brown A, et al.). Global, regional, and national  
494 incidence, prevalence, and years lived with disability for 310 diseases and injuries,  
495 1990-2015: A systematic analysis for the global burden of disease study 2015.  
496 *Lancet*. 2016;388(10053):1545-602.
- 497 [10] Mayberg HS, Lozano AM, Voon V, McNeely HE, Seminowicz D, Hamani C, et al.  
498 Deep brain stimulation for treatment-resistant depression. *Neuron*.  
499 2005;45(5):651-60.
- 500 [11] Dougherty DD, Weiss AP, Cosgrove GR, Alpert NM, Cassem EH, Nierenberg AA,  
501 et al. Cerebral metabolic correlates as potential predictors of response to anterior  
502 cingulotomy for treatment of major depression. *J Neurosurg*. 2003;99(6):1010-7.
- 503 [12] Seminowicz DA, Mayberg HS, McIntosh AR, Goldapple K, Kennedy S, Segal Z, et  
504 al. Limbic-frontal circuitry in major depression: A path modeling metanalysis.  
505 *Neuroimage*. 2004;22(1):409-18.
- 506 [13] Li CT, Wang SJ, Hirvonen J, Hsieh JC, Bai YM, Hong CJ, et al. Antidepressant  
507 mechanism of add-on repetitive transcranial magnetic stimulation in medication-  
508 resistant depression using cerebral glucose metabolism. *J Affect Disord*.  
509 2010;127(1-3):219-29.
- 510 [14] Li CT, Su TP, Wang SJ, Tu PC, Hsieh JC. Prefrontal glucose metabolism in  
511 medication-resistant major depression. *Br J Psychiatry*. 2015;206(4):316-23.
- 512 [15] Li CT, Chen MH, Lin WC, Hong CJ, Yang BH, Liu RS, et al. The effects of low-dose  
513 ketamine on the prefrontal cortex and amygdala in treatment-resistant depression:  
514 A randomized controlled study. *Hum Brain Mapp*. 2016;37(3):1080-90.

- 515 [16] Conway CR, Chibnall JT, Gebara MA, Price JL, Snyder AZ, Mintun MA, et al.  
516 Association of cerebral metabolic activity changes with vagus nerve stimulation  
517 antidepressant response in treatment-resistant depression. *Brain Stimul.*  
518 2013;6(5):788-97.
- 519 [17] Pardo JV, Sheikh SA, Schwindt GC, Lee JT, Surerus-Johnson C, Pardo PJ, et al.  
520 Functional neuroimaging in treatment-resistant depression. *Depression: Mind and*  
521 *Body.* 2007;3(2):57-70.
- 522 [18] Pardo JV, Sheikh SA, Schwindt GC, Lee JT, Kuskowski MA, Surerus C, et al.  
523 Chronic vagus nerve stimulation for treatment-resistant depression decreases  
524 resting ventromedial prefrontal glucose metabolism. *Neuroimage.* 2008;42(2):879-  
525 89.
- 526 [19] Mayberg HS. Targeted electrode-based modulation of neural circuits for  
527 depression. *J Clin Invest.* 2009;119(4):717-25.
- 528 [20] Drevets WC. Neuroimaging abnormalities in the amygdala in mood disorders. *Ann*  
529 *N Y Acad of Sci.* 2006;985:420-44.
- 530 [21] Drevets WC, Savitz J, Trimble M. The subgenual anterior cingulate cortex in mood  
531 disorders. *CNS Spectr.* 2008;13(8):663-81.
- 532 [22] Kennedy SH, Evans KR, Kruger S, Mayberg HS, Meyer JH, McCann S, et al.  
533 Changes in regional brain glucose metabolism measured with positron emission  
534 tomography after paroxetine treatment of major depression. *Am J Psychiatry.*  
535 2001;158(6):899-905.

- 536 [23] Mayberg HS, Brannan SK, Tekell JL, Silva JA, Mahurin RK, McGinnis S, et al.  
537 Regional metabolic effects of fluoxetine in major depression: Serial changes and  
538 relationship to clinical response. *Biol Psychiatry*. 2000;48(8):830-43.
- 539 [24] Li CT, Chen LF, Tu PC, Wang SJ, Chen MH, Su TP, et al. Impaired prefronto-  
540 thalamic functional connectivity as a key feature of treatment-resistant depression:  
541 A combined MEG, PET and rTMS study. *PLoS One*. 2013;8(8):e70089.
- 542 [25] Cao B, Luo Q, Fu Y, Du L, Qiu T, Yang X, et al. Predicting individual responses to  
543 the electroconvulsive therapy with hippocampal subfield volumes in major  
544 depression disorder. *Sci Rep*. 2018;8(1):5434.
- 545 [26] Gosnell SN, Curtis KN, Velasquez K, Fowler JC, Madan A, Goodman W, et al.  
546 Habenular connectivity may predict treatment response in depressed psychiatric  
547 inpatients. *J Affect Disord*. 2019;242:211-9.
- 548 [27] Epstein LR. Symbyax: The first medication approved for treatment-resistant  
549 depression. *Pharmanote*. 2009;24(11).
- 550 [28] Shelton RC, Williamson DJ, Corya SA, Sanger TM, Van Campen LE, Case M, et al.  
551 Olanzapine/fluoxetine combination for treatment-resistant depression: A controlled  
552 study of SSRI and nortriptyline resistance. *J Clin Psychiatry*. 2005;66(10):1289-97.
- 553 [29] Shelton RC, Tollefson GD, Tohen M, Stahl S, Gannon KS, Jacobs TG, et al. A  
554 novel augmentation strategy for treating resistant major depression. *Am J*  
555 *Psychiatry*. 2001;158(1):131-4.
- 556 [30] Haridas RM, Parkar SR, Ghulam R, Amin G, Thombre KG, Srivastava A, et al.  
557 Olanzapine and fluoxetine combination in severe or resistant depression. *Indian J*  
558 *Psychiatry*. 2003;45(4):234-8.

- 559 [31] Bobo WV, Shelton RC. Efficacy, safety and tolerability of Symbyax for acute-phase  
560 management of treatment-resistant depression. *Expert Rev Neurother.*  
561 2010;10(5):651-70.
- 562 [32] Trivedi MH, Thase ME, Osuntokun O, Henley DB, Case M, Watson SB, et al. An  
563 integrated analysis of olanzapine/fluoxetine combination in clinical trials of  
564 treatment-resistant depression. *J Clin Psychiatry.* 2009;70(3):387-96.
- 565 [33] Brunner E, Tohen M, Osuntokun O, Landry J, Thase ME. Efficacy and safety of  
566 olanzapine/fluoxetine combination vs fluoxetine monotherapy following successful  
567 combination therapy of treatment-resistant major depressive disorder.  
568 *Neuropsychopharmacology.* 2014;39(11):2549-59.
- 569 [34] Luan S, Wan H, Wang S, Li H, Zhang B. Efficacy and safety of  
570 olanzapine/fluoxetine combination in the treatment of treatment-resistant  
571 depression: A meta-analysis of randomized controlled trials. *Neuropsychiatr Dis*  
572 *Treat.* 2017;13:609-20.
- 573 [35] Dodd S, Berk M. Olanzapine/fluoxetine combination for treatment-resistant  
574 depression: Efficacy and clinical utility. *Expert Rev Neurother.* 2008;8(9):1299-306.
- 575 [36] Zhang W, Perry KW, Wong DT, Potts BD, Bao J, Tollefson GD, et al. Synergistic  
576 effects of olanzapine and other antipsychotic agents in combination with fluoxetine  
577 on norepinephrine and dopamine release in rat prefrontal cortex.  
578 *Neuropsychopharmacology.* 2000;23(3):250-62.
- 579 [37] Koch S, Perry KW, Bymaster FP. Brain region and dose effects of an  
580 olanzapine/fluoxetine combination on extracellular monoamine concentrations in  
581 the rat. *Neuropharmacology.* 2004;46(2):232-42.

- 582 [38] Horowitz JM, Goyal A, Ramdeen N, Hallas BH, Horowitz AT, Torres G.  
583 Characterization of fluoxetine plus olanzapine treatment in rats: A behavior,  
584 endocrine, and immediate-early gene expression analysis. *Synapse*.  
585 2003;50(4):353-64.
- 586 [39] Kodama M, Fujioka T, Duman RS. Chronic olanzapine or fluoxetine administration  
587 increases cell proliferation in hippocampus and prefrontal cortex of adult rat. *Biol*  
588 *Psychiatry*. 2004;56(8):570-80.
- 589 [40] Agostinho FR, Reus GZ, Stringari RB, Ribeiro KF, Pfaffenseller B, Stertz L, et al.  
590 Olanzapine plus fluoxetine treatment increases NT-3 protein levels in the rat  
591 prefrontal cortex. *Neurosci Lett*. 2011;497(2):99-103.
- 592 [41] Spitzer RL, Williams JB, Gibbon M, First MB. The Structured Clinical interview for  
593 DSM-III-R (SCID). I: History, rationale, and description. *Arch Gen Psychiatry*.  
594 1992;49(8):624-9.
- 595 [42] Pardo JV, Lee JT, Kuskowski MA, Munch KR, Carlis JV, Sheikh SA, et al.  
596 Fluorodeoxyglucose positron emission tomography of mild cognitive impairment  
597 with clinical follow-up at 3 years. *Alzheimers Dement*. 2010;6(4):326-33.
- 598 [43] First MB, Gibbon M, Spitzer RL, Williams JBW. Structured Clinical Interview for  
599 DSM-IV Axis I Disorders, Clinician Version (SCID-CV). Washington, D.C.:  
600 American Psychiatric Press, Inc., 1996. New York: American Psychiatric  
601 Publishing, Inc.; 1996.
- 602 [44] Montgomery SA, Asberg M. A new depression scale designed to be sensitive to  
603 change. *Br J Psychiatry*. 1979;134:382-9.

- 604 [45] Hamilton M. The assessment of anxiety states by rating. *Br J Med Psychol.*  
605 1959;32(1):50-5.
- 606 [46] Guy W. ECDEU Assessment Manual For Psychopharmacology. Rockville, MD: US  
607 Department of Health, Education, and Welfare Public Health Service Alcohol, Drug  
608 Abuse, and Mental Health Administration; 1976.
- 609 [47] Folstein MF, Folstein SE, McHugh PR. "Mini-mental state". A practical method for  
610 grading the cognitive state of patients for the clinician. *J Psychiatr Res.*  
611 1975;12(3):189-98.
- 612 [48] Zachary RA. Shipley Institute of Living Scale Revised Manual. Los Angeles:  
613 Western Psychological Services; 1986.
- 614 [49] Oldfield RC. The assessment and analysis of handedness: The Edinburgh  
615 inventory. *Neuropsychologia.* 1971;9(1):97-113.
- 616 [50] McNair DM, Lorr M, Droppleman LF. Manual for the Profile Of Mood States. San  
617 Diego, CA: Educational and Industrial Testing Services; 1971.
- 618 [51] Watson D, Clark LA. Preliminary manual for the positive affective negative affect  
619 schedule. *J Pers Soc.* 1999;44:644-51.
- 620 [52] Zald DH, Lee JT, Fluegel KW, Pardo JV. Aversive gustatory stimulation activates  
621 limbic circuits in humans. *Brain.* 1998;121 ( Pt 6):1143-54.
- 622 [53] Talairach J, Tournoux P. Coplanar Stereotaxic Atlas of the Human Brain. New  
623 York: Thieme; 1988.
- 624 [54] Minoshima S, Koeppe RA, Frey KA, Kuhl DE. Anatomic standardization: Linear  
625 scaling and nonlinear warping of functional brain images. *J Nucl Med.*  
626 1994;35(9):1528-37.



- 627 [55] Lee JT, Munch KR, Carlis JV, Pardo JV. Internet image viewer (iiv). BMC Med  
628 Imaging. 2008;8:10.
- 629 [56] Pardo JV, Sheikh SA, Schwindt GC, Lee JT, Surerus-Johnson C, Pardo PJ, et al.  
630 Functional neuroimaging in treatment-resistant depression. Depression: Mind and  
631 Body. 2007;3:57-70.
- 632 [57] Liotti M, Mayberg HS. The role of functional neuroimaging in the neuropsychology  
633 of depression. J Clin Exp Neuropsychol. 2001;23(1):121-36.
- 634 [58] Lancaster JL, Woldorff MG, Parsons LM, Liotti M, Freitas CS, Rainey L, et al.  
635 Automated Talairach atlas labels for functional brain mapping. Hum Brain Mapp.  
636 2000;10(3):120-31.
- 637 [59] Mayberg HS, Liotti M, Brannan SK, McGinnis S, Mahurin RK, Jerabek PA, et al.  
638 Reciprocal limbic-cortical function and negative mood: Converging PET findings in  
639 depression and normal sadness. Am J Psychiatry. 1999;156(5):675-82.
- 640 [60] Zald DH, Mattson DL, Pardo JV. Brain activity in ventromedial prefrontal cortex  
641 correlates with individual differences in negative affect. Proc Natl Acad Sci U S A.  
642 2002;99(4):2450-4.
- 643 [61] Vaccarino AL, Evans KR, Sills TL, Kalali AH. Symptoms of anxiety in depression:  
644 Assessment of item performance of the hamilton anxiety rating scale in patients  
645 with depression. Depress Anxiety. 2008;25(12):1006-13.
- 646 [62] Schmidt ME, Ernst M, Matochik JA, Maisog JM, Pan BS, Zametkin AJ, et al.  
647 Cerebral glucose metabolism during pharmacologic studies: Test-retest under  
648 placebo conditions. J Nucl Med. 1996;37(7):1142-9.

649 [63] Schaefer SM, Abercrombie HC, Lindgren KA, Larson CL, Ward RT, Oakes TR, et

650 al. Six-month test-retest reliability of MRI-defined PET measures of regional

651 cerebral glucose metabolic rate in selected subcortical structures. *Hum Brain*

652 *Mapp.* 2000;10(1):1-9.

653 [64] Fallmar D, Lilja J, Kilander L, Danfors T, Lubberink M, Larsson EM, et al. Validation

654 of true low-dose  $^{18}\text{F}$ -FDG PET of the brain. *Am J Nucl Med Mol Imaging.*

655 2016;6(5):269-76.

656

## 657 **Supporting Information**

658 **S1 Figure. Weights before and after O/F combination.**

659 **S2 Figure. Brain glucose uptake in non-responders: Post- minus Pre- O/F**  
660 **treatment.**

661 Stereotactically normalized. Image left is right side of brain. AC-PC plane 0 mm. Color  
662 scale shows Z-scores with threshold  $Z = \pm 3.3$ .

663 **S3 Figure. Brain glucose uptake in responders: Post- minus Pre- O/F treatment**

664 Stereotactically normalized. Image left is right side of brain. AC-PC plane 0 mm. Color  
665 scale shows Z-scores with threshold at  $Z = \pm 3.3$ .

666 **S4 Figure. Brain glucose uptake for all subjects: Post- minus Pre- O/F treatment.**

667 Stereotactically normalized. Image left is right side of brain. AC-PC plane 0 mm. Color  
668 scale shows Z-scores with threshold at  $Z = \pm 3.3$ .

669 **S5 Figure. Differences in resting brain glucose uptake between individual**  
670 **subjects (N = 9) at baseline (after washout) and a normative data set (N = 30).**

671 For visualizing individual metabolic fingerprints of all nine subjects, the threshold was  
672 set at  $t = 2.0$  that is the usual threshold used for studying change in individuals [42].

673 Each subject is represented by a study number (e.g., pL0009). Age regression was  
674 used to match individual subject's age to that of the normative group. R, right; L, left, A,  
675 anterior; P, posterior. The patterns are heterogenous. For example, some individuals  
676 have sgACC/VMPFC hypoactive, hyperactivity, or no change.

677 **S6 Figure. Main effects of TIME and ROI on glucose uptake.**

678 **S1 Table. Individual subject's weight, depression scores, and anxiety ratings.**

679 **S2 Table. Correlation matrix for metabolism in bilateral ROIs.**

680 Green cells below diagonal are for Pre-treatment; blue cells above diagonal are for

681 Post-treatment. R, right; L, left; Hippo, hippocampus; sgACC, subgenual anterior

682 cingulate/VMPFC. †  $p < 0.007$

683

684

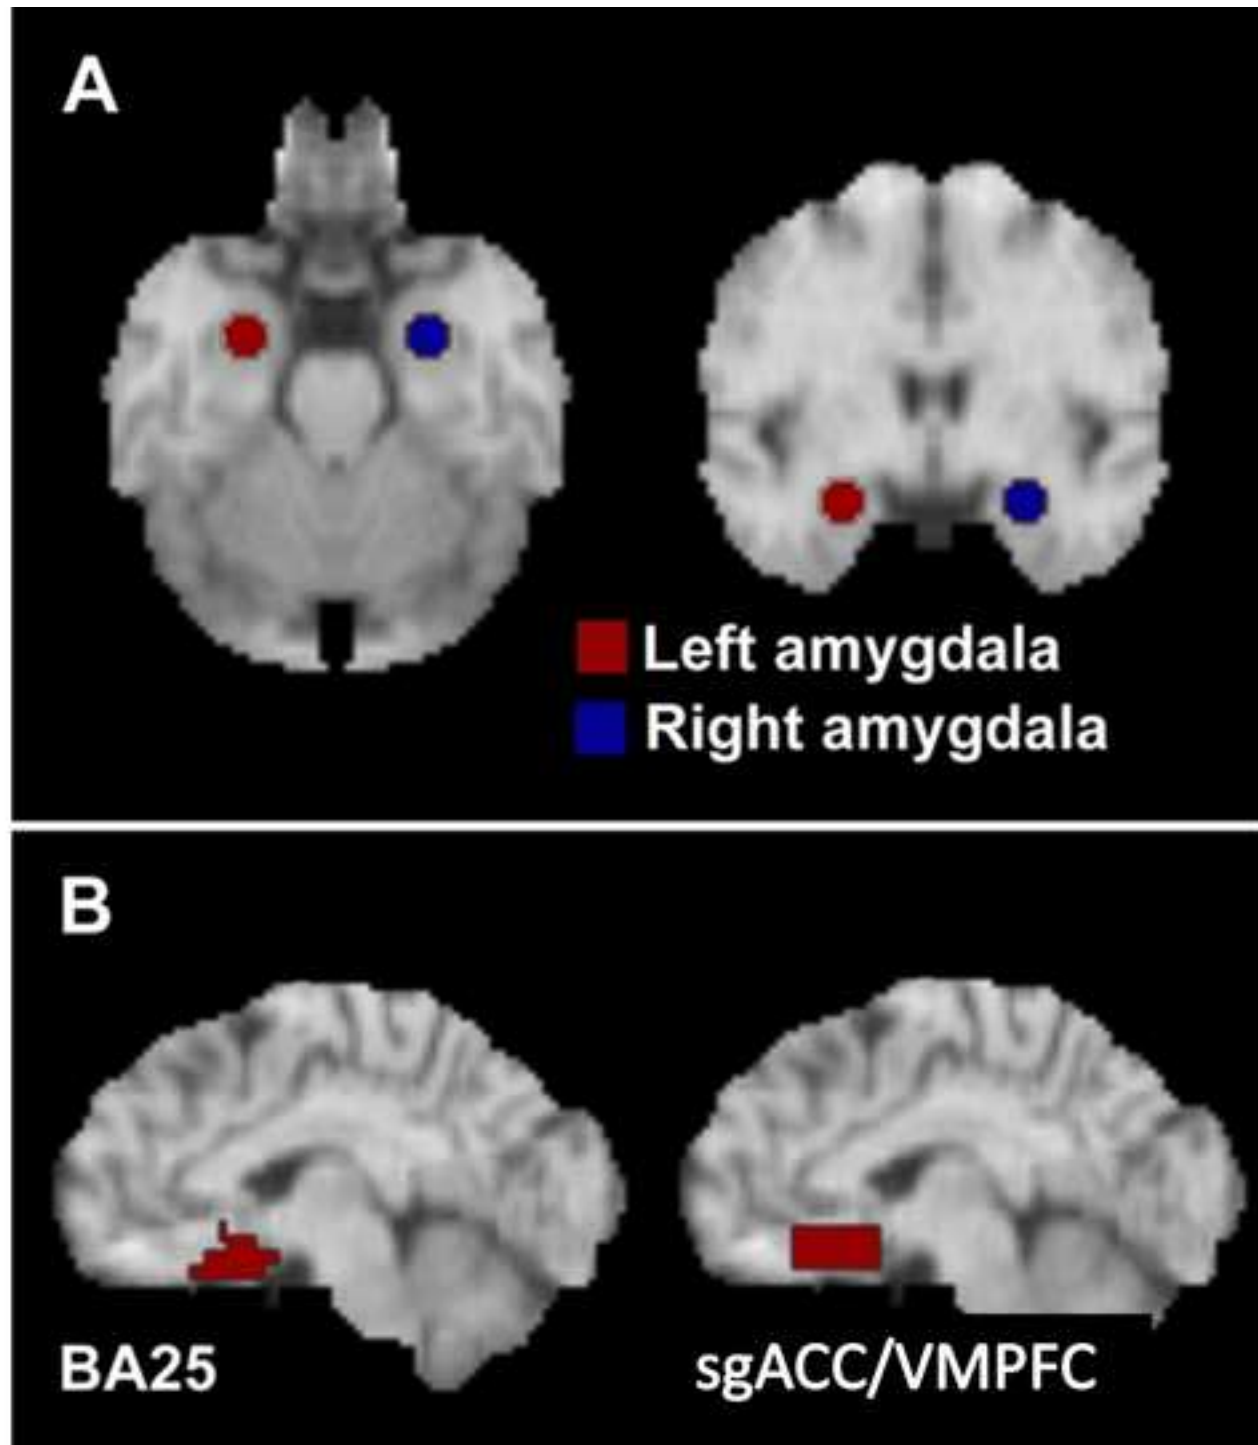

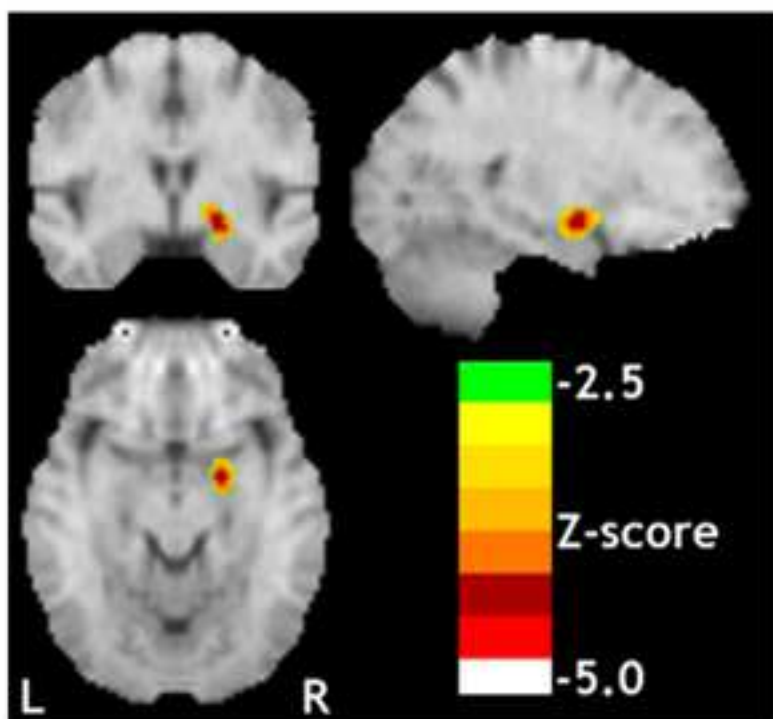

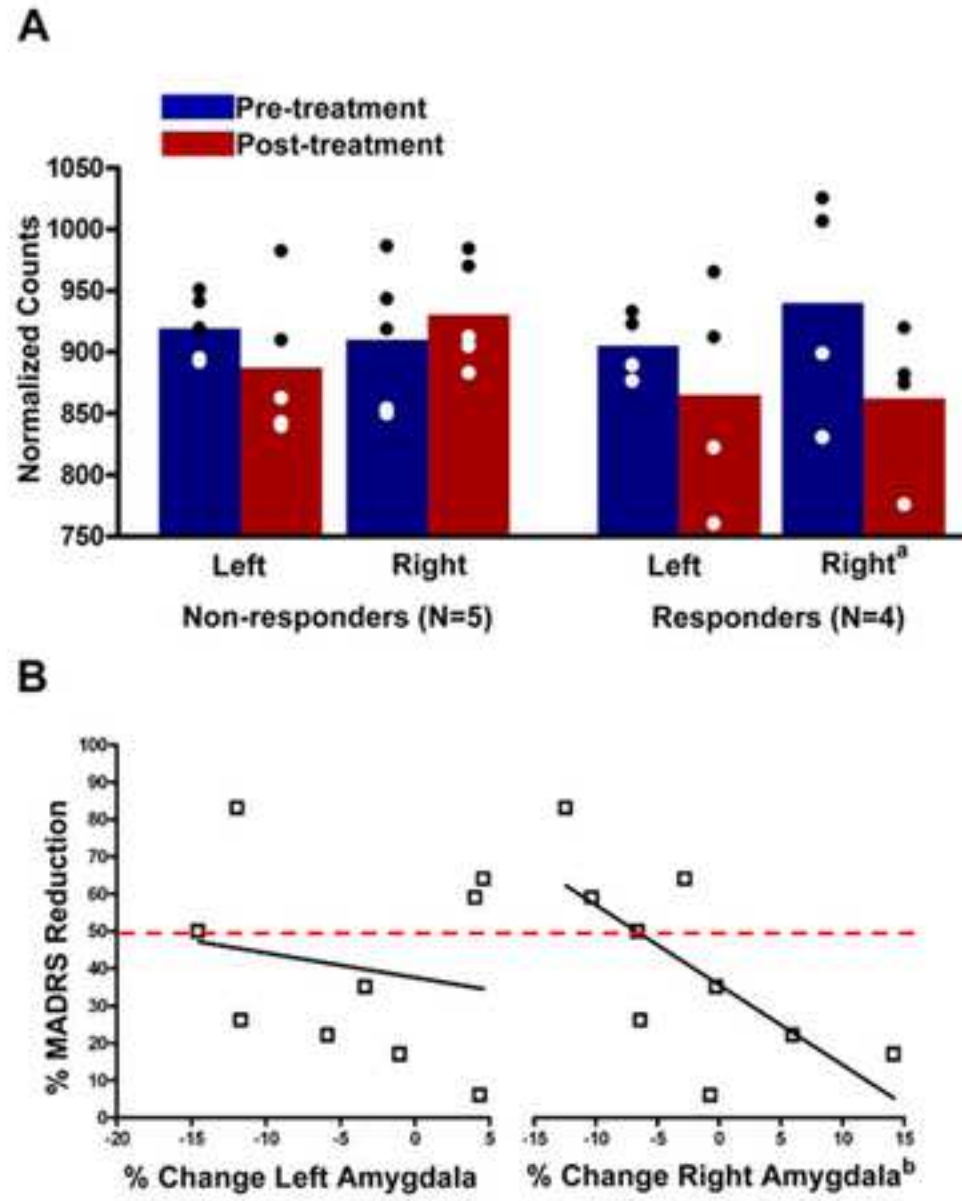

Source: http://biorxiv.org/content/10.1101/624288v1.full.pdf
